# Supplementary material for: Engineering thiospinel-based hollow heterostructured nanoarrays for boosting electrocatalytic oxygen evolution reaction
Source: Royal Society of Chemistry journal article supplement (doi:10.1039/d2qi00077f), 2022-01-01
Supplement: d2qi00077f1.pdf [file d2qi00077f1.pdf]

## Supporting Information for

### Engineering thiospinel-based hollow heterostructured nanoarrays for boosting electrocatalytic oxygen evolution reaction

Kun Wang, Qing Wang, Lei Jin, Bingji Huang, Hui Xu\*, Xingyue Qian, Haiqun

Chen\*, Guangyu He\*

*Key Laboratory of Advanced Catalytic Materials and Technology, Advanced  
Catalysis and Green Manufacturing Collaborative Innovation Center, Changzhou*

*University, Changzhou, Jiangsu Province 213164, China.*

*Corresponding authors: xuhui006@cczu.edu.cn (H. Xu); hqchen@cczu.edu.cn (H.*

*Chen); hegy@cczu.edu.cn (G. He)*

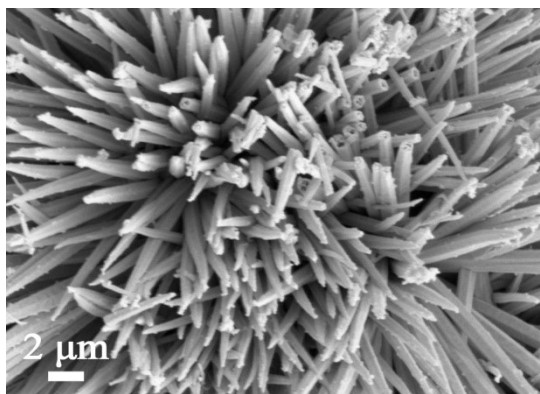

**Fig.S1** SEM image of Ni<sub>3</sub>S<sub>2</sub>/NiCo<sub>2</sub>S<sub>4</sub>@NF.

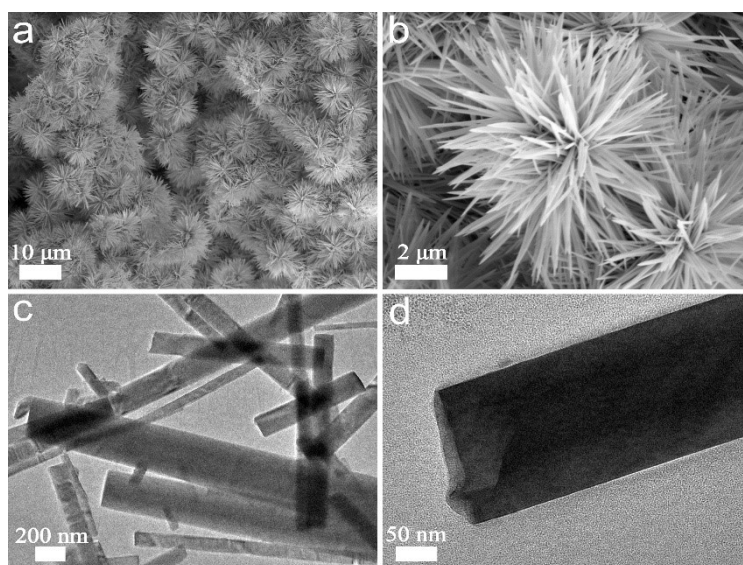

**Fig.S2** (a, b) SEM images and (c, d) TEM images of the NiCo-LDH@NF.

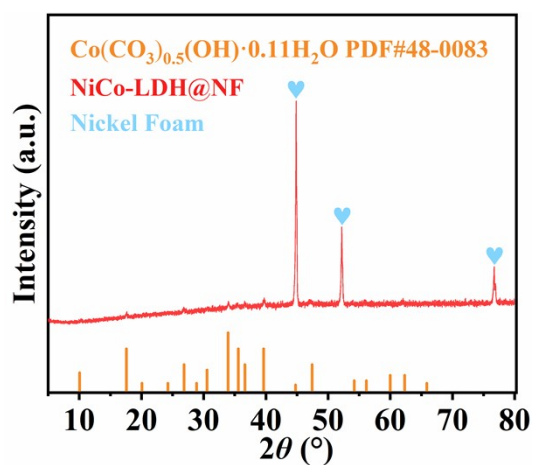

**Fig.S3** XRD pattern of NiCo-LDH@NF.

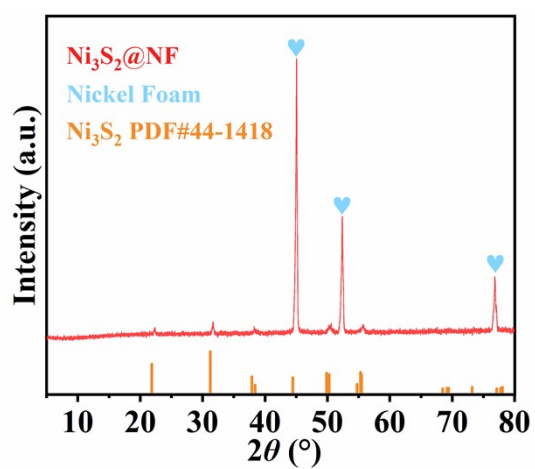

**Fig.S4** XRD pattern of Ni<sub>3</sub>S<sub>2</sub>@NF.

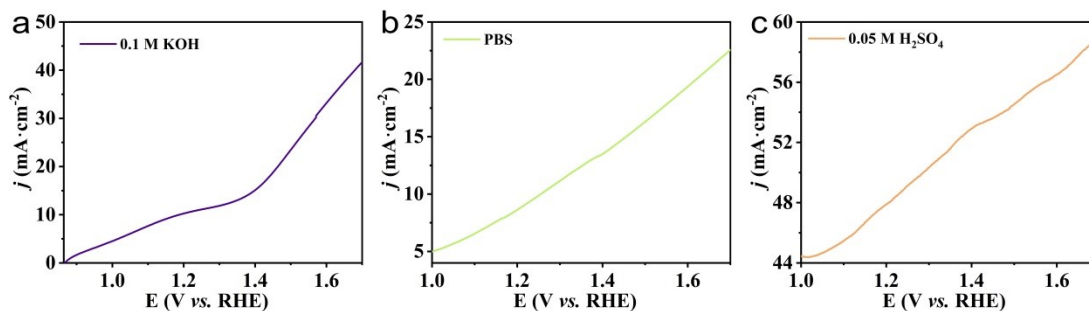

**Fig.S5** OER polarization curves of  $\text{Ni}_3\text{S}_2/\text{NiCo}_2\text{S}_4@\text{NF}$  in (a) 0.1 M KOH, (b) PBS and (c) 0.05 M  $\text{H}_2\text{SO}_4$  electrolyte.

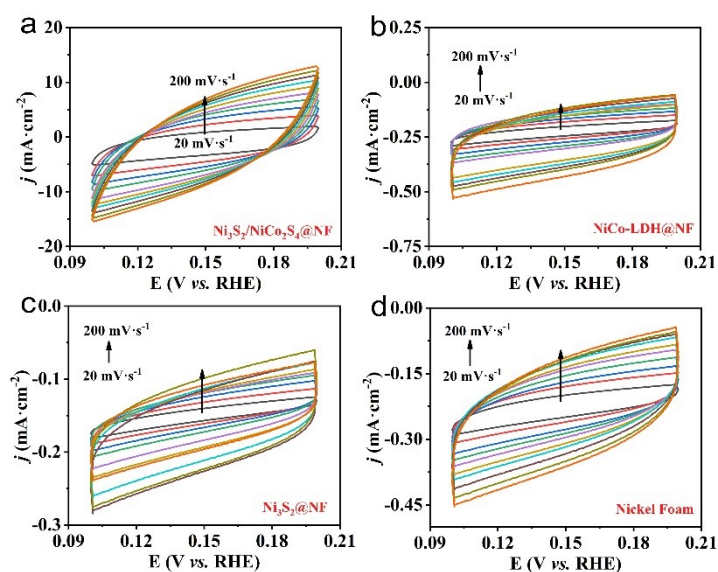

**Fig.S6** Cyclic voltammograms in a capacitive current region at a scan rate ranging from 20 to 200  $\text{mV}\cdot\text{s}^{-1}$ . (a)  $\text{Ni}_3\text{S}_2/\text{NiCo}_2\text{S}_4@\text{NF}$ , (b)  $\text{NiCo-LDH}@\text{NF}$ , (c)  $\text{Ni}_3\text{S}_2@\text{NF}$  and (d) NF.

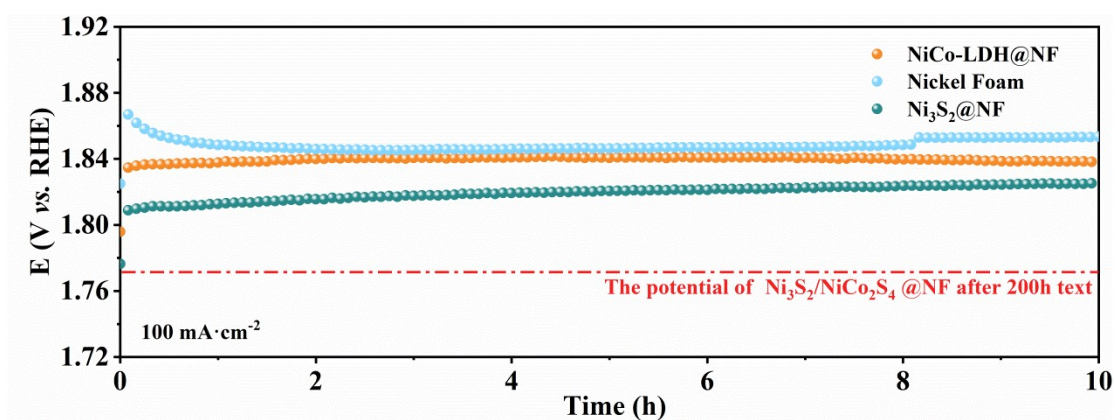

**Fig.S7** Chronopotentiometry test of  $\text{Ni}_3\text{S}_2@\text{NF}$ ,  $\text{NiCo-LDH}@\text{NF}$ , and NF at a constant current density of  $100 \text{ mA}\cdot\text{cm}^{-2}$ .

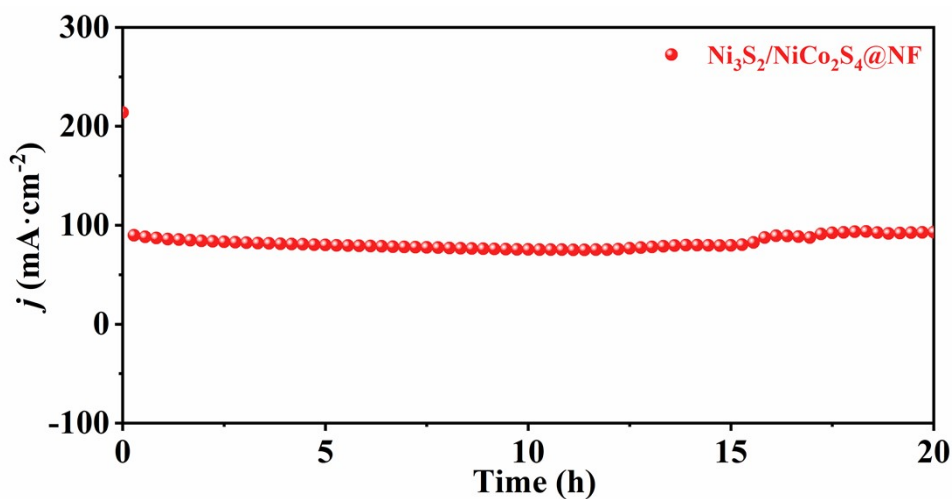

Fig.S8 Chronoamperometry test of  $\text{Ni}_3\text{S}_2/\text{NiCo}_2\text{S}_4@\text{NF}$ .

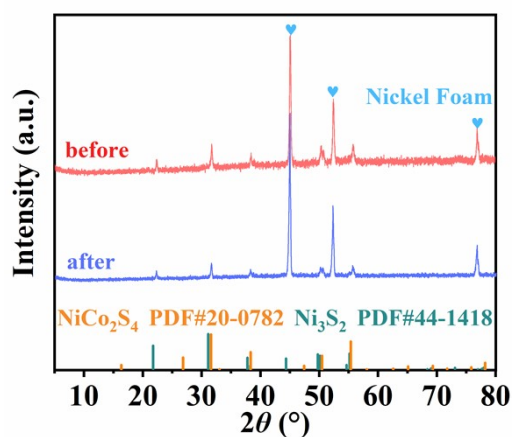

Fig.S9 XRD pattern of  $\text{Ni}_3\text{S}_2/\text{NiCo}_2\text{S}_4@\text{NF}$  before and after a continuous 200 h stability test.

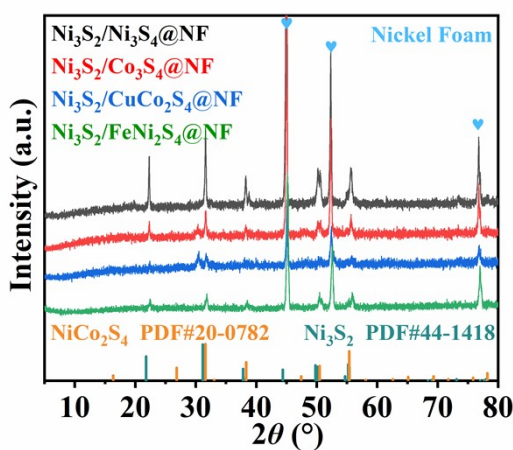

Fig.S10 XRD pattern of  $\text{Ni}_3\text{S}_2/\text{Ni}_3\text{S}_4@\text{NF}$ ,  $\text{Ni}_3\text{S}_2/\text{Co}_3\text{S}_4@\text{NF}$ ,  $\text{Ni}_3\text{S}_2/\text{CuCo}_2\text{S}_4@\text{NF}$  and  $\text{Ni}_3\text{S}_2/\text{FeNi}_2\text{S}_4@\text{NF}$ .

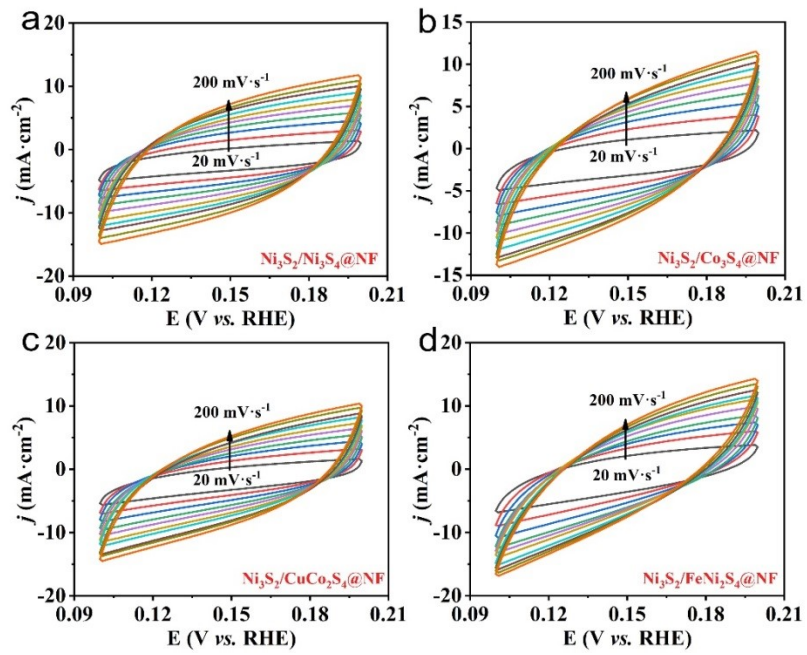

**Fig.S11** Cyclic voltammograms in a capacitive current region at a scan rate from 20 to 200 mV·s<sup>-1</sup>. (a) Ni<sub>3</sub>S<sub>2</sub>/Ni<sub>3</sub>S<sub>4</sub>@NF, (b) Ni<sub>3</sub>S<sub>2</sub>/Co<sub>3</sub>S<sub>4</sub>@NF, (c) Ni<sub>3</sub>S<sub>2</sub>/CuCo<sub>2</sub>S<sub>4</sub>@NF and (d) Ni<sub>3</sub>S<sub>2</sub>/FeNi<sub>2</sub>S<sub>4</sub>@NF.

**Table S1** OER activity comparison of different catalysts in alkaline condition.

| <b>Catalysts</b>                                                       | <b>Electrolyte</b> | <b>Overpotential</b>                    | <b>Reference</b> |
|------------------------------------------------------------------------|--------------------|-----------------------------------------|------------------|
| <b>Ni<sub>3</sub>S<sub>2</sub>/NiCo<sub>2</sub>S<sub>4</sub>@NF</b>    | <b>1.0 M KOH</b>   | <b>177 mV at 100 mA·cm<sup>-2</sup></b> | <b>This Work</b> |
| NiCo <sub>2</sub> S <sub>4</sub> @NiFe-LDH@NF                          | 1.0 M KOH          | 201 mV at 60 mA·cm <sup>-2</sup>        | 1                |
| P-NiCo <sub>2</sub> S <sub>4</sub> @NF                                 | 1.0 M KOH          | 300 mV at 50 mA·cm <sup>-2</sup>        | 2                |
| Mn-NiCo <sub>2</sub> S <sub>4</sub> @NF                                | 1.0 M KOH          | 220 mV at 10 mA·cm <sup>-2</sup>        | 3                |
| NiCo <sub>2</sub> S <sub>4</sub> /NiFeP@NF                             | 1.0 M KOH          | 293 mV at 100 mA·cm <sup>-2</sup>       | 4                |
| NiCo <sub>2</sub> S <sub>4</sub> @NF                                   | 1.0 M KOH          | 279 mV at 50 mA·cm <sup>-2</sup>        | 5                |
| NiCo <sub>2</sub> S <sub>4</sub> @N-rGO@NF                             | 1.0 M KOH          | 230 mV at 10 mA·cm <sup>-2</sup>        | 6                |
| MoS <sub>2</sub> /NiCo <sub>2</sub> S <sub>4</sub> @NF                 | 1.0 M KOH          | 220 mV at 10 mA·cm <sup>-2</sup>        | 7                |
| Ru-NiCo <sub>2</sub> S <sub>4-x</sub> @NF                              | 1.0 M KOH          | 330 mV at 100 mA·cm <sup>-2</sup>       | 8                |
| CuCo <sub>2</sub> S <sub>4</sub> /NiCo <sub>2</sub> S <sub>4</sub> @NF | 1.0 M KOH          | 271 mV at 10mA·cm <sup>-2</sup>         | 9                |
| NiCo <sub>2</sub> S <sub>4</sub> @NF                                   | 1.0 M KOH          | 319 mV at 100 mA·cm <sup>-2</sup>       | 10               |
| NiCo <sub>2</sub> S <sub>4</sub> @NF                                   | 1.0 M KOH          | 260 mV at 10 mA·cm <sup>-2</sup>        | 11               |

## References

1. J. Liu, J. Wang, B. Zhang, Y. Ruan, L. Lv, X. Ji, K. Xu, L. Miao and J. Jiang, Hierarchical NiCo<sub>2</sub>S<sub>4</sub>@NiFe LDH heterostructures supported on nickel foam for enhanced overall-water-splitting activity, *ACS Appl. Mater. Interfaces*, 2017, 9, 15364-15372.
2. K. Min, R. Yoo, S. Kim, H. Kim, S. E. Shim, D. Lim and S.-H. Baeck, Facile synthesis of P-doped NiCo<sub>2</sub>S<sub>4</sub> nanoneedles supported on Ni foam as highly efficient electrocatalysts for alkaline oxygen evolution reaction, *Electrochim. Acta*, 2021, 396, 139236.
3. X. Yu, S. Xu, X. Liu, X. Cheng, Y. Du and Q. Wu, Mn-doped NiCo<sub>2</sub>S<sub>4</sub> nanosheet array as an efficient and durable electrocatalyst for oxygen evolution reaction, *J. Alloys Compd.*, 2021, 878, 160388.
4. J. Jiang, F. Li, H. Su, Y. Gao, N. Li and L. Ge, Flower-like NiCo<sub>2</sub>S<sub>4</sub>/NiFeP/NF composite material as an effective electrocatalyst with high overall water splitting performance, *Chin Chem Lett*, 2021.
5. Y. Gong, J. Wang, Y. Lin, Z. Yang, H. Pan and Z. Xu, Synthesis of 1D to 3D nanostructured NiCo<sub>2</sub>S<sub>4</sub> on nickel foam and their application in oxygen evolution reaction, *Appl. Surf. Sci.*, 2019, 476, 600-607.
6. H. S. Lee, J. Pan, G. S. Gund and H. S. Park, Vertically Aligned NiCo<sub>2</sub>S<sub>4</sub> Nanosheets Deposited on N-Doped Graphene for Bifunctional and Durable Electrode of Overall Water Splitting, *Adv. Mater. Interfaces*, 2020, 7, 2000138.
7. X. Xu, W. Zhong, L. Zhang, G. Liu, W. Xu, Y. Zhang and Y. Du, NiCo-LDHs derived NiCo<sub>2</sub>S<sub>4</sub> nanostructure coated by MoS<sub>2</sub> nanosheets as high-efficiency bifunctional electrocatalysts for overall water splitting, *Surf. Coat. Technol.*, 2020, 397, 126065.
8. H. Su, S. Song, Y. Gao, N. Li, Y. Fu, L. Ge, W. Song, J. Liu and T. Ma, In Situ Electronic Redistribution Tuning of NiCo<sub>2</sub>S<sub>4</sub> Nanosheets for Enhanced Electrocatalysis, *Adv. Funct. Mater.*, 2021, 2109731.
9. L. Ma, J. Liang, T. Chen, Y. Liu, S. Li and G. Fang, 3D CuCo<sub>2</sub>S<sub>4</sub>/NiCo<sub>2</sub>S<sub>4</sub> core-shell composites as efficient bifunctional electrocatalyst electrodes for overall water

splitting, *Electrochim. Acta*, 2019, 326, 135002.

10. J. Yu, C. Lv, L. Zhao, L. Zhang, Z. Wang and Q. Liu, Reverse Microemulsion-Assisted Synthesis of NiCo<sub>2</sub>S<sub>4</sub> Nanoflakes Supported on Nickel Foam for Electrochemical Overall Water Splitting, *Adv. Mater. Interfaces*, 2018, 5, 1701396.

11. A. Sivanantham, P. Ganesan and S. Shanmugam, Hierarchical NiCo<sub>2</sub>S<sub>4</sub> nanowire arrays supported on Ni foam: an efficient and durable bifunctional electrocatalyst for oxygen and hydrogen evolution reactions, *Adv. Funct. Mater.*, 2016, 26, 4661-4672.
